# Supplementary material
Source: HighWire-hosted journal article supplement (https://www.jneurosci.org/highwire/filestream/601504/field_highwire_adjunct_files/1/Supplemental_Material.pdf)
Supplement: Supplemental_Material.pdf [file Supplemental_Material.pdf]

## Supplemental Data

### Materials and Methods

***Slice preparations for biochemistry:*** The procedure for slice preparations and treatment are the same as *Materials and Methods* in the main text. For D1R agonist treatments of AcbSh slices, after MCH or vehicle treatment, aCSF was replaced with fresh 30°C aCSF containing 10  $\mu$ M SKF 81297 (Sigma, St. Louis, MO) or vehicle for five minutes. For EGTA experiments, slices were incubated in 1 mM EGTA for 1 hour prior to treatment with MCH.

***Western blotting procedure and Antibodies:*** Procedures are as described in *Materials and Methods*.

***Statistical analyses:*** Analysis of SKF 81297 treatments is described in the main text. A multivariate ANOVA was used for the EGTA experiment followed by Tukey post-hoc analysis.

### Supplemental Figure Legends

**Fig. S1.** MCH mediates a reduction of GluR1 pSer<sup>845</sup>. Graphs represent the ratio of phosphorylated signal to total protein signal for all treatments. Below the graphs are treatment conditions and representative western blot bands for GluR1 pSer<sup>845</sup> and total GluR1. (A) MCH dose-dependently reduces D1 receptor-mediated GluR1 pSer<sup>845</sup>. (B) MCH significantly reduces basal GluR1 pSer<sup>845</sup> within 20 min \*p<0.05, \*\*p<0.01. Error bars indicate +SEM.

**Fig. S2.** MCH treatment does not alter total GluR1 protein levels, and total GluR1 levels are not changed in MCH-OE and MCH-KO mice. (A) Graph represent the ratio of total GluR1 to GAPDH, normalized to aCSF control (C, n=6 slices per group). MCH-OE (B, n=4 per group) and MCH-KO (C, n=4 per group) blots are represented as the ratio of total GluR1 to  $\beta$ -tubulin, and are normalized to WT controls. Error bars indicate +SEM.

**Fig. S3.** Extracellular calcium is not required for MCHR1-mediated reduction in GluR1 pSer<sup>845</sup>. Data is normalized to aCSF control. \*p<0.05 and \*\*p<0.01 relative to aCSF control, #p<0.01 relative to EGTA alone. Error bars indicate +SEM.

**Fig. S4.** Local infusions control neuronal activity. (a) Location of cannula (wide tract) and microwire electrode tracts in AcbSh; fluorescent-conjugated muscimol (FCM) is red. (b) Rasters representing the timing of action potential for three AcbSh neurons; note that neuronal activity dramatically decreases after FCM infusions. (c) Wideband activity from Neuron 3 before FCM infusion; spikes represent putative action potentials. Time of recording from C is noted in panel B. (d) Wideband activity from channel Neuron 3 after FCM infusion.

**Fig S5.** Normalized firing rate for nucleus accumbens neurons recorded in aCSF (blue lines; n=7 neurons) or MCH (red lines; n=6 neurons) recording session from two rats. Gray box represents infusion time.
